# Supplementary material for: A metal-free coumarin-based fluorescent probe for the turn-on monitoring of carbon monoxide in an aqueous solution and living cells
Source: Royal Society of Chemistry journal article supplement (doi:10.1039/d0an02107e), 2020-12-09
Supplement: d0an02107e1.pdf [file d0an02107e1.pdf]

## Supporting Information

### **A metal-free coumarin-based fluorescent probe for turn on monitoring carbon monoxide in aqueous solution and living cells**

Shiqing Zhang,<sup>a</sup> Xinyue Mu,<sup>a</sup> Jinbiao Zhu,<sup>a</sup> Liqiang Yan,<sup>\*a</sup>

College of Chemistry and Bioengineering, Guilin University of Technology, Guilin, Guangxi 541006, P.R. China

E-mail: liqiangyan@glut.edu.cn

#### Contents

|                                                                                                                                                                            |   |
|----------------------------------------------------------------------------------------------------------------------------------------------------------------------------|---|
| Table S1. Comparison of the properties of fluorescent probes for CO.....                                                                                                   | 1 |
| Figure S1. <sup>1</sup> H NMR of probe NCCA in DMSO-d <sub>6</sub> .....                                                                                                   | 3 |
| Figure S2. <sup>13</sup> C NMR of probe NCCA in DMSO-d <sub>6</sub> .....                                                                                                  | 4 |
| Figure S3. HRMS of probe NCCA in CH <sub>3</sub> CN.....                                                                                                                   | 4 |
| Figure S4. Changes of UV-vis spectra of probe NCCA with CORM-3 over time. Inset: Color change. ....                                                                        | 4 |
| Figure S5. Plot of normalized fluorescence intensity of probe (10 μM) in the presence of CO (800 μM) with time ( λ <sub>ex</sub> = 100 nm, λ <sub>em</sub> = 450 nm) ..... | 5 |
| Figure S6. Changes of fluorescence intensity of probe NCCA (10 μM) with and without CORM-3 (100 μM) in mixed solution with different water contents. ....                  | 5 |
| Figure S7. <sup>1</sup> H NMR of probe NCCA with CORM-3 in DMSO-d <sub>6</sub> .....                                                                                       | 5 |
| Figure S8. HRMS of probe NCCA with CORM-3 in DMSO-d <sub>6</sub> .....                                                                                                     | 6 |
| Figure S9. Optimized molecular structures and corresponding orbital electron distribution of probe with and without CORM-3.....                                            | 6 |
| Figure S10. Cell viability of HepG2 cells after 24 hours of incubation with different concentrations of probe NCCA by MTT assay.....                                       | 7 |

Table S1. Comparison of the properties of fluorescent probes for CO.

| Probe                                                                                                      | Pd-free | solvent                    | LOD              | Linear range       | Ref. |
|------------------------------------------------------------------------------------------------------------|---------|----------------------------|------------------|--------------------|------|
| 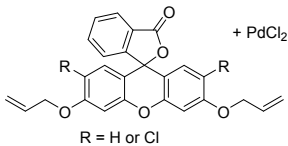<br>R = H or Cl           | No      | PBS with 0.5%<br>DMSO, v/v | 46 nM, 29<br>nM  | 0 – 50 $\mu$ M     | 16   |
| 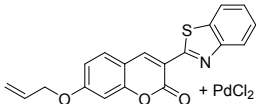<br>+ PdCl <sub>2</sub>   | No      | PBS with 50%<br>DMSO, v/v  | 78nm             | 0.4 – 70 $\mu$ M   | 17   |
| 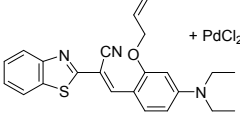<br>+ PdCl <sub>2</sub>   | No      | PBS with 5%<br>DMSO, v/v   | 30.8 nM          | 1 – 5 $\mu$ M      | 18   |
| 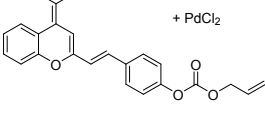<br>+ PdCl <sub>2</sub>   | No      | PBS with 50%<br>DMSO, v/v  | 57 nM            | 0 – 30 $\mu$ M     | 19   |
| 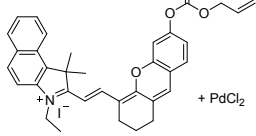<br>+ PdCl <sub>2</sub>  | No      | PBS                        | 0.17 $\mu$ M     | 0 – 60 $\mu$ M     | 20   |
| 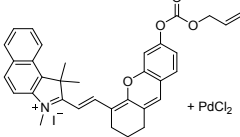<br>+ PdCl <sub>2</sub> | No      | PBS with 0.5%<br>DMSO, v/v | 3.2 nM           | 0 – 8 $\mu$ M      | 21   |
| 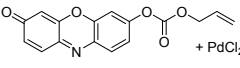<br>+ PdCl <sub>2</sub> | No      | PBS                        | 62 nM            | 0 – 25 $\mu$ M     | 22   |
| 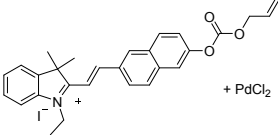<br>+ PdCl <sub>2</sub> | No      | HEPES with 20%<br>DMSO     | 3.8 $\mu$ M      | 0 – 30 $\mu$ M     | 23   |
| 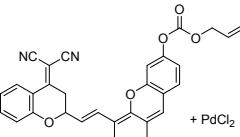<br>+ PdCl <sub>2</sub> | No      | PBS                        | 0.33 $\mu$ M     | 1 – 100<br>$\mu$ M | 24   |
| 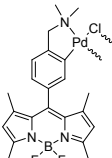<br>+ PdCl <sub>2</sub> | No      | DPBS                       | Not<br>mentioned | Not<br>mentioned   | 25   |
| 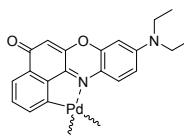<br>+ PdCl <sub>2</sub> | No      | PBS with 5% DMSO           | 50 nM            | 0 – 1.5 $\mu$ M    | 26   |

Continued table S1. Comparison of the properties of fluorescent probes for CO.

| Probe                                                                               | Pd-free | solvent                  | LOD           | Linear range      | Ref.      |
|-------------------------------------------------------------------------------------|---------|--------------------------|---------------|-------------------|-----------|
| 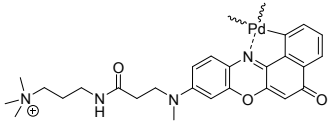   | No      | DMSO/DPBS = 1 : 19, v/v  | 0.23 $\mu$ M  | 5 – 25 $\mu$ M    | 27        |
| 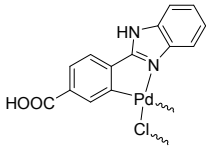   | No      | HEPES with 50% EtOH      | 0.06 $\mu$ M  | 0 – 6 $\mu$ M     | 28        |
| 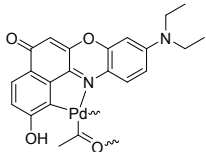   | No      | Methanol                 | Not mentioned | Not mentioned     | 29        |
| 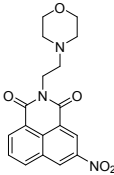   | Yes     | HEPES with 1% DMSO       | 0.60 $\mu$ M  | 1–10 $\mu$ M      | 30        |
| 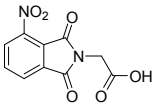 | Yes     | PBS with 0.5% DMSO, v/v  | 16 nM         | 0–14 $\mu$ M      | 31        |
| 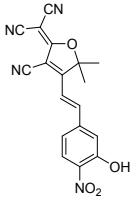 | Yes     | HEPES with 30% DMSO, v/v | 6.1 nM        | 0 – 7 $\mu$ M     | 32        |
| 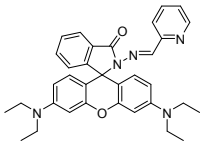 | Yes     | PBS                      | 10 nM         | 0.1 – 1.0 $\mu$ M | 33        |
| 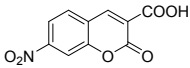 | Yes     | PBS with 1% DMSO, v/v    | 12 nM         | 0 – 20 $\mu$ M    | This work |

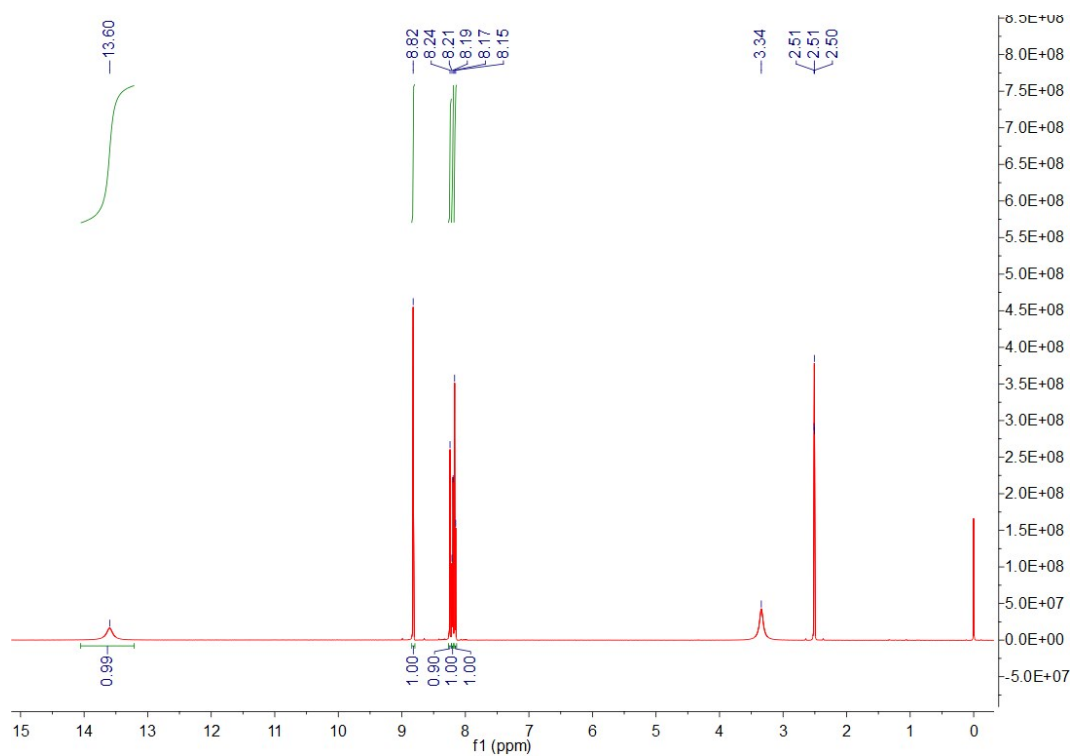

Figure S1. <sup>1</sup>H NMR of probe NCCA in DMSO-d<sub>6</sub>.

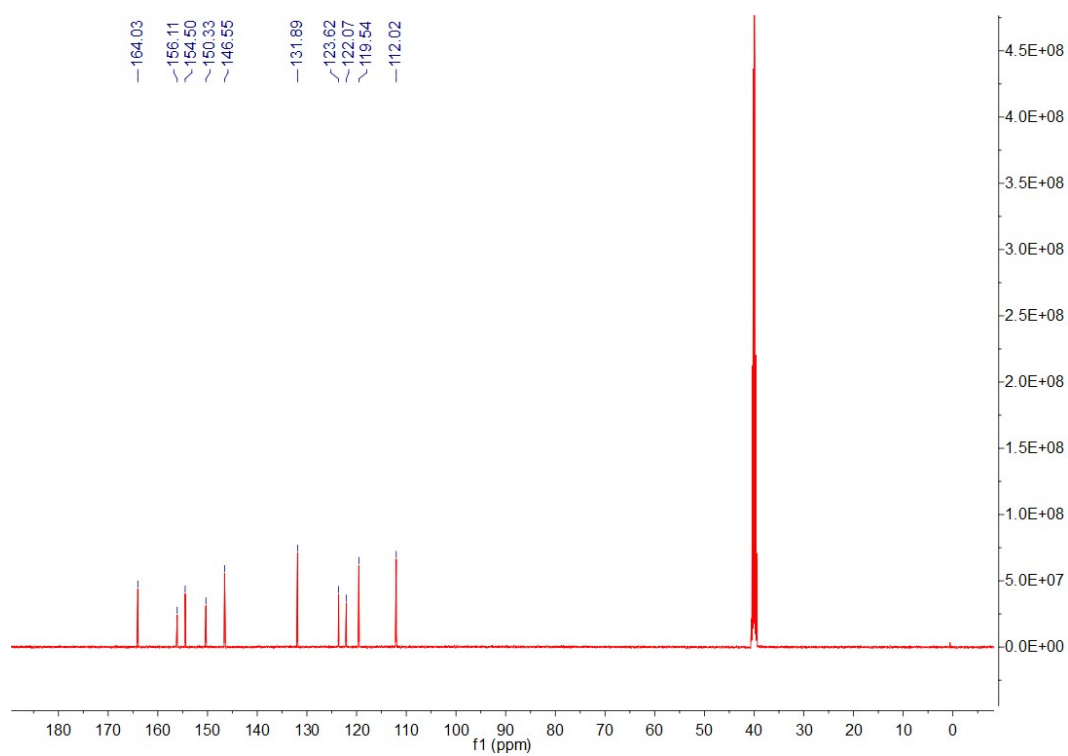

Figure S2. <sup>13</sup>C NMR of probe NCCA in DMSO-d<sub>6</sub>.

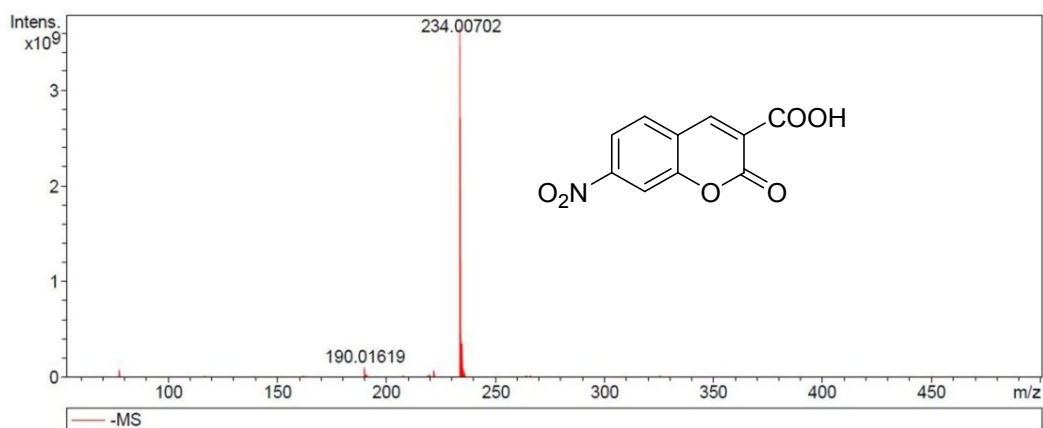

Figure S3. HRMS of probe NCCA in CH<sub>3</sub>CN.

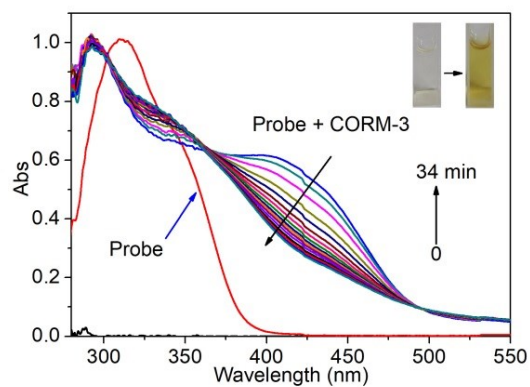

Figure S4. Changes of UV-vis spectra of probe NCCA with CORM-3 over time. Inset: Color change.

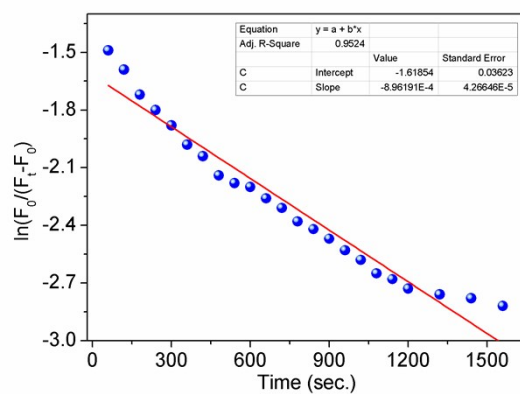

Figure S5. Plot of normalized fluorescence intensity of probe (10  $\mu$ M) in the presence of CO (800  $\mu$ M) with time (  $\lambda_{\text{ex}}$  = 100 nm,  $\lambda_{\text{em}}$  = 450 nm)

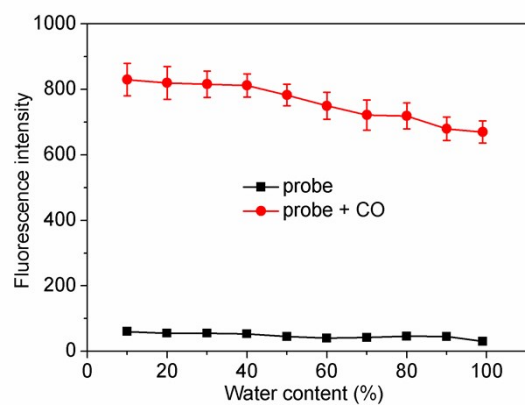

Figure S6. Changes of fluorescence intensity of probe NCCA (10  $\mu\text{M}$ ) with and without CORM-3 (100  $\mu\text{M}$ ) in mixed solution with different water contents.

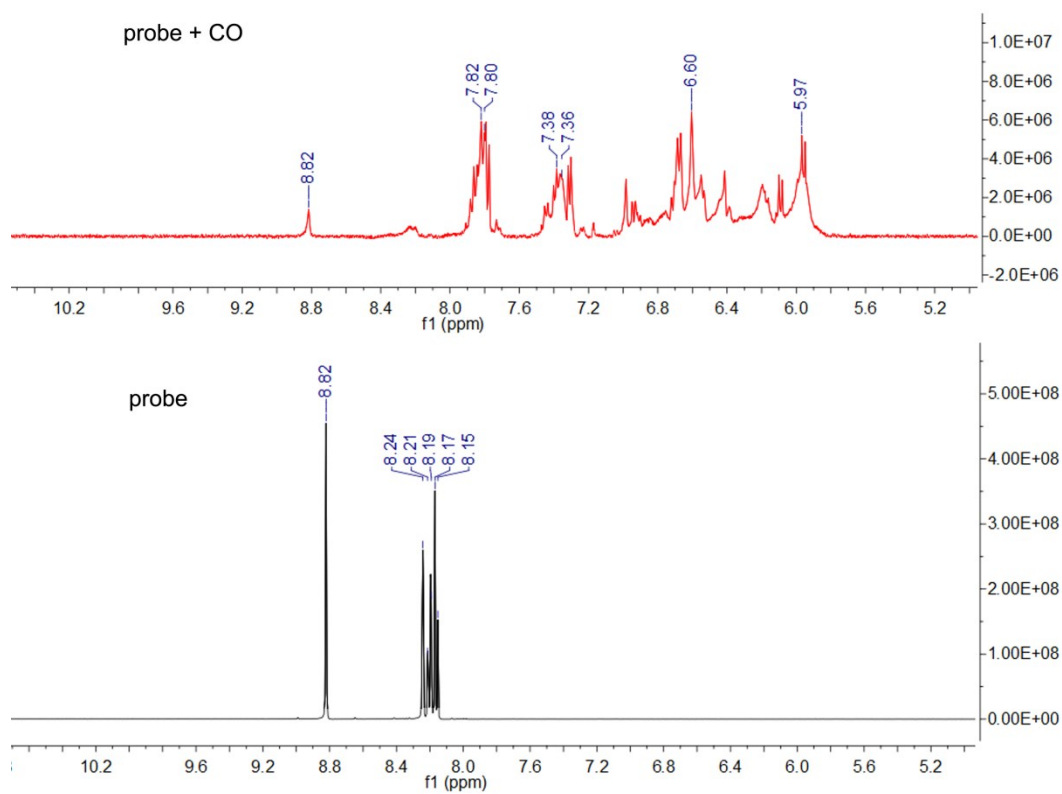

Figure S7.  $^1\text{H}$  NMR of probe NCCA with CORM-3 in  $\text{DMSO-d}_6$ .

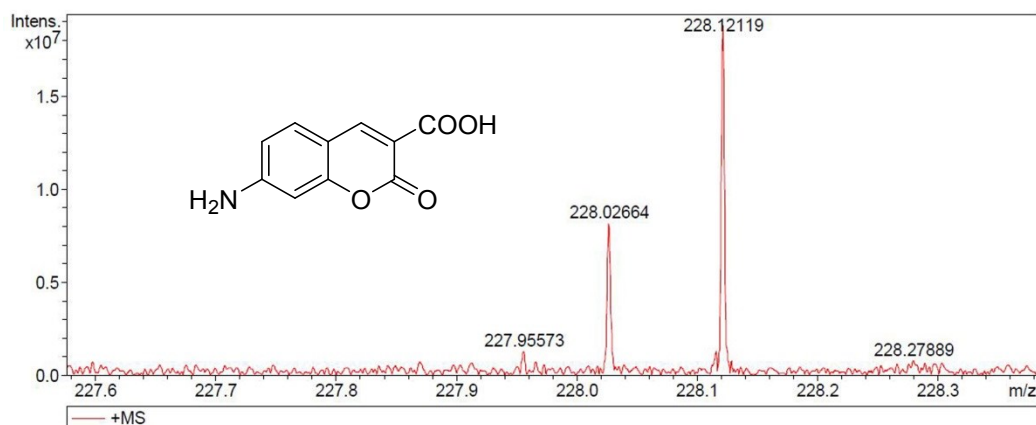

Figure S8. HRMS of probe NCCA with CORM-3 in DMSO-d<sub>6</sub>.

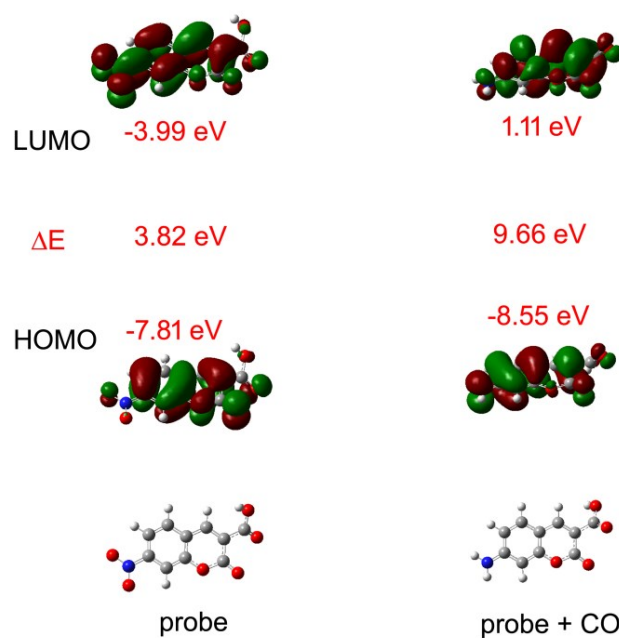

Figure S9. Optimized molecular structures and corresponding orbital electron distribution of probe with and without CORM-3.

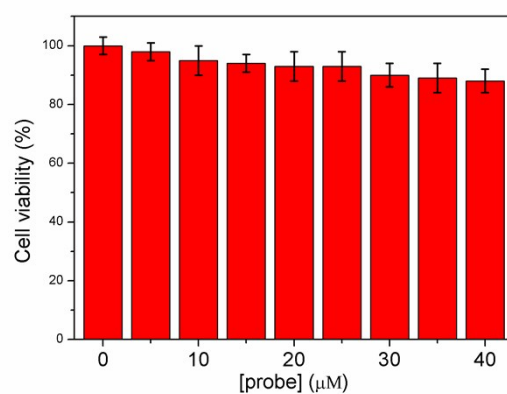

Figure S10. Cell viability of HepG2 cells after 24 hours of incubation with different concentrations of probe NCCA (0, 5, 10, 15, 20, 25, 30, 35 and 40  $\mu\text{M}$ , respectively) by MTT assay.
